# Supplementary material for: The Jahn–Teller and pseudo-Jahn–Teller effects in the propyne radical cation
Source: Royal Society of Chemistry journal article supplement (doi:10.1039/d2cp01930b), 2022-01-01
Supplement: d2cp01930b1.pdf [file d2cp01930b1.pdf]

**Electronic Supplementary Information for the “The Jahn-Teller  
and pseudo-Jahn-Teller effects in propyne radical cation”**

Arun Kumar Kanakati, Vadala Jhansi Rani and Susanta Mahapatra\*  
*School of Chemistry, University of Hyderabad, Hyderabad 500 046, India*

---

\* Corresponding author, E-mail: [susanta.mahapatra@uohyd.ac.in](mailto:susanta.mahapatra@uohyd.ac.in)

## STEPS TO ARRIVE AT EQS. 21-24

The diabatic quadratic  $E \otimes e$ -JT electronic Hamiltonian of the degenerate electronic state is given by

$$\Delta\mathcal{H} = \begin{bmatrix} u^x & u^{xy} \\ u^{xy} & u^y \end{bmatrix}, \quad (\text{A1a})$$

with

$$u^{x/y} = E^0 + \sum_{i \in a_1} \kappa_i Q_i + \frac{1}{2} \sum_{i \in a_1} \gamma_i Q_i^2 \pm \sum_{i \in e} \lambda_i Q_{ix} + \frac{1}{2} \sum_{i \in e} \gamma_i (Q_{ix}^2 + Q_{iy}^2) \pm \frac{1}{2} \sum_{i \in e} \eta_i (Q_{ix}^2 - Q_{iy}^2), \quad (\text{A1b})$$

and

$$u^{xy} = \sum_{i \in e} [\lambda_i Q_{iy} - 2\eta_i Q_{ix} Q_{iy}]. \quad (\text{A1c})$$

Upon diagonalization of Eq. A1a, the adiabatic potential energy surfaces is obtained

$$\mathcal{V}_{\pm} = \frac{(u^x + u^y)}{2} \pm \left[ \left( \frac{u^x - u^y}{2} \right)^2 + (u^{xy})^2 \right]^{1/2}. \quad (\text{A2a})$$

Substitution of Eqs. A1b and A1c into Eq. A2a and add addition of the harmonic potential of reference state  $\mathcal{V}_0$  (Eq. 6 of the text) yields

$$\begin{aligned} \mathcal{V}_{\pm} + \mathcal{V}_0 = V_{\pm} = E^0 + \sum_{i \in a_1} \kappa_i Q_i + \frac{1}{2} \sum_{i \in a_1} \gamma_i Q_i^2 + \frac{1}{2} \sum_{i \in a_1} \omega_i Q_i^2 + \frac{1}{2} \sum_{i \in e} \gamma_i (Q_{ix}^2 + Q_{iy}^2) + \frac{1}{2} \sum_{i \in e} \omega_i (Q_{ix}^2 + Q_{iy}^2) \\ \pm \left[ \left( \sum_{i \in e} \lambda_i Q_{ix} + \frac{1}{2} \sum_{i \in e} \eta_i (Q_{ix}^2 - Q_{iy}^2) \right)^2 + \sum_{i \in e} (\lambda_i Q_{iy} - 2\eta_i Q_{ix} Q_{iy})^2 \right]^{1/2}. \end{aligned} \quad (\text{A2b})$$

The minimum of the seam of CIs occurs at the minimum of  $V_+$  in the space of symmetric vibrational modes. Upon minimization of  $V_+$  with respect to  $Q_i$  one obtains Eq. 23 (see text). Next the location of the minimum and saddle points of the lower adiabatic sheet are obtained by setting the first derivative of  $V_-$  with respect to the symmetric modes and degenerate modes to zero separately. Upon substitution of the results into  $V_-$  one obtains Eqs. 21 and 22 (see text). Note that absolute value of  $\eta_i$  distinguishes between minimum and saddle point. Finally the JT stabilization energy (Eq. 24) is obtained by subtracting Eq. 21 from Eq. 23.

TABLE S1. Higher order coupling parameters of  $\tilde{X}^2E$ ,  $\tilde{A}^2E$  states and PJT coupling between  $\tilde{A}^2E$ - $\tilde{B}^2A_1$  electronic states are derived from EOMIP-CCSD electronic structure data.

| $\tilde{X}^2E$                                        |                   |                   |                    |                              |                    |                          |
|-------------------------------------------------------|-------------------|-------------------|--------------------|------------------------------|--------------------|--------------------------|
| Mode                                                  | $\sigma_i$        | $\sigma'_i$       | $\delta_i$         | $\delta'_i$ ( $\delta''_i$ ) | $\rho_i$           | $\rho'_i$ ( $\rho''_i$ ) |
| $a_1$                                                 |                   |                   |                    |                              |                    |                          |
| $\nu_1$                                               | 0.000898          |                   | 0.001036           |                              |                    |                          |
| $\nu_2$                                               | -0.000691         |                   | -                  |                              |                    |                          |
| $\nu_3$                                               | 0.002899          |                   | -                  |                              |                    |                          |
| $\nu_4$                                               | -0.008080         |                   | -0.000832          |                              |                    |                          |
| $\nu_5$                                               | -0.001012         |                   | -                  |                              |                    |                          |
| $e$                                                   |                   |                   |                    |                              |                    |                          |
| $\nu_6$                                               | -0.0000007        | 0.0004            | -                  | -                            | -                  | -                        |
| $\nu_7$                                               | -0.000013         | 0.0060            | -                  | -                            | -                  | -                        |
| $\nu_8$                                               | -0.000011         | 0.0057            | -                  | -                            | -                  | -                        |
| $\nu_9$                                               | 0.00000009        | 0.0014            | -0.00053           | 0.0000004 (0.0000006)        | -0.00000003        | -0.000953 (-0.001846)    |
| $\nu_{10}$                                            | -0.000008         | 0.0078            | 0.00348            | 0.0000219 (0.0000286)        | -                  | -                        |
| $\tilde{A}^2E$                                        |                   |                   |                    |                              |                    |                          |
| Mode                                                  | $\sigma_i$        | $\sigma'_i$       | $\delta_i$         | $\delta'_i$ ( $\delta''_i$ ) | $\rho_i$           | $\rho'_i$ ( $\rho''_i$ ) |
| $a_1$                                                 |                   |                   |                    |                              |                    |                          |
| $\nu_1$                                               | 0.000670          |                   | 0.000104           |                              |                    |                          |
| $\nu_2$                                               | -                 |                   | -                  |                              |                    |                          |
| $\nu_3$                                               | -                 |                   | -                  |                              |                    |                          |
| $\nu_4$                                               | 0.018160          |                   | 0.008480           |                              |                    |                          |
| $\nu_5$                                               | 0.002170          |                   | -                  |                              |                    |                          |
| $e$                                                   |                   |                   |                    |                              |                    |                          |
| $\nu_6$                                               | -0.00220          | 0.02060           | 0.00890            | 0.00011 ( 0.00011)           | 0.00150            | -0.00360 (-0.00360)      |
| $\nu_7$                                               | 0.00008           | 0.00942           | 0.01822            | -0.00001 (-0.00001)          | -0.00005           | -0.00397 (-0.00397)      |
| $\nu_8$                                               | -0.00024          | 0.01210           | 0.00848            | -0.00002 (-0.00002)          | 0.00019            | -0.00335 (-0.00335)      |
| $\nu_9$                                               | -0.00057          | 0.05901           | -0.01472           | 0.00022 ( 0.00022)           | 0.00065            | -0.00244 (-0.00244)      |
| $\nu_{10}$                                            | -0.00001          | 0.00564           | 0.00129            | 0.00004 ( 0.00004)           | -                  | -                        |
| $\tilde{A}^2E \times \tilde{B}^2A_1$ (PJT parameters) |                   |                   |                    |                              |                    |                          |
| Mode                                                  | $\lambda_i^{(3)}$ | $\lambda_i^{(4)}$ | $\lambda_i^{(4')}$ | $\lambda_i^{(5)}$            | $\lambda_i^{(5')}$ |                          |
| $e$                                                   |                   |                   |                    |                              |                    |                          |
| $\nu_6$                                               | 0.0528            | -0.0070           | -0.0070            | -0.0067                      | -0.0067            |                          |
| $\nu_7$                                               | 0.0767            | -0.0108           | -0.0108            | -0.0094                      | -0.0094            |                          |
| $\nu_8$                                               | 0.0161            | -0.0031           | -0.0031            | -0.0019                      | -0.0019            |                          |
| $\nu_9$                                               | -0.0017           | -0.0007           | -0.0007            | 0.0007                       | 0.0007             |                          |
| $\nu_{10}$                                            | 0.0003            | 0.0001            | 0.0001             | -                            | -                  |                          |

TABLE S2. Same as in Table S1 and the parameters are derived from CASSCF-MRCI electronic structure data.

| $\tilde{X}^2E$                                        |                   |                   |                    |                              |                    |                          |
|-------------------------------------------------------|-------------------|-------------------|--------------------|------------------------------|--------------------|--------------------------|
| Mode                                                  | $\sigma_i$        | $\sigma'_i$       | $\delta_i$         | $\delta'_i$ ( $\delta''_i$ ) | $\rho_i$           | $\rho'_i$ ( $\rho''_i$ ) |
| $a_1$                                                 |                   |                   |                    |                              |                    |                          |
| $\nu_1$                                               | 0.000842          |                   | 0.000785           |                              |                    |                          |
| $\nu_2$                                               | -0.000850         |                   | -                  |                              |                    |                          |
| $\nu_3$                                               | 0.002782          |                   | -                  |                              |                    |                          |
| $\nu_4$                                               | -0.008205         |                   | -0.001367          |                              |                    |                          |
| $\nu_5$                                               | -0.001129         |                   | -                  |                              |                    |                          |
| $e$                                                   |                   |                   |                    |                              |                    |                          |
| $\nu_6$                                               | -                 | -                 | -                  | -                            | -                  | -                        |
| $\nu_7$                                               | -0.000013         | 0.0060            | -                  | -                            | -                  | -                        |
| $\nu_8$                                               | -0.000010         | 0.0059            | -                  | -                            | -                  | -                        |
| $\nu_9$                                               | 0.00000014        | 0.0025            | 0.000894           | -0.000213 ( 0.000214)        | -0.0000001         | -0.000553 (-0.001538)    |
| $\nu_{10}$                                            | -0.0000087        | 0.0071            | 0.000498           | 0.000010 (-0.000006)         | -                  | -                        |
| $\tilde{A}^2E$                                        |                   |                   |                    |                              |                    |                          |
| Mode                                                  | $\sigma_i$        | $\sigma'_i$       | $\delta_i$         | $\delta'_i$ ( $\delta''_i$ ) | $\rho_i$           | $\rho'_i$ ( $\rho''_i$ ) |
| $a_1$                                                 |                   |                   |                    |                              |                    |                          |
| $\nu_1$                                               | 0.0005796         |                   | -                  |                              |                    |                          |
| $\nu_2$                                               | -                 |                   | -                  |                              |                    |                          |
| $\nu_3$                                               | -                 |                   | -                  |                              |                    |                          |
| $\nu_4$                                               | 0.0188956         |                   | 0.0090729          |                              |                    |                          |
| $\nu_5$                                               | 0.0024462         |                   | -                  |                              |                    |                          |
| $e$                                                   |                   |                   |                    |                              |                    |                          |
| $\nu_6$                                               | 0.00073           | -0.02796          | 0.02753            | -0.000267 (-0.000267)        | -0.00042           | 0.00310 ( 0.00310)       |
| $\nu_7$                                               | -0.00002          | 0.02677           | 0.02656            | 0.000001 ( 0.000001)         | 0.00001            | -0.00601 (-0.00601)      |
| $\nu_8$                                               | -0.00030          | 0.02306           | 0.01037            | -0.000020 (-0.000020)        | 0.00023            | -0.00464 (-0.00464)      |
| $\nu_9$                                               | -0.00048          | 0.04481           | -0.03453           | 0.000263 ( 0.000263)         | 0.00051            | 0.00126 ( 0.00126)       |
| $\nu_{10}$                                            | 0.00039           | 0.00018           | 0.00406            | 0.000019 ( 0.000019)         | -                  | -                        |
| $\tilde{A}^2E \times \tilde{B}^2A_1$ (PJT parameters) |                   |                   |                    |                              |                    |                          |
| Mode                                                  | $\lambda_i^{(3)}$ | $\lambda_i^{(4)}$ | $\lambda_i^{(4')}$ | $\lambda_i^{(5)}$            | $\lambda_i^{(5')}$ |                          |
| $e$                                                   |                   |                   |                    |                              |                    |                          |
| $\nu_6$                                               | -0.0256           | -0.0075           | -0.0075            | 0.0080                       | 0.0080             |                          |
| $\nu_7$                                               | 0.0866            | -0.0134           | -0.0134            | -0.0099                      | -0.0099            |                          |
| $\nu_8$                                               | 0.0232            | -0.0041           | -0.0041            | -0.0029                      | -0.0029            |                          |
| $\nu_9$                                               | -0.0094           | -0.0010           | -0.0010            | 0.0018                       | 0.0018             |                          |
| $\nu_{10}$                                            | -0.0020           | -0.0000           | -0.0000            | -                            | -                  |                          |

TABLE S3. The number of harmonic oscillator (HO) basis functions along the totally symmetric and degenerate vibrational modes and the dimension of the secular matrix used in the calculation of the stick vibrational spectra of the  $\tilde{X}^2E$ ,  $\tilde{A}^2E$  and  $\tilde{B}^2A_1$  electronic states of  $\text{CH}_3\text{CCH}^+$  shown in various figures.

| Electronic states | Vibrational modes                                                                    | No. of HO basis        | Dimension of secular matrix | Figure(s)          |
|-------------------|--------------------------------------------------------------------------------------|------------------------|-----------------------------|--------------------|
| $\tilde{X}^2E$    | $\nu_1, \nu_2, \nu_3$                                                                | (10,12,20)             | 691200                      | Figs. 5(b) and (c) |
|                   | $\nu_4, \nu_5,$                                                                      | (18,16)                |                             |                    |
|                   | $\nu_{6x}, \nu_{6y}, \nu_{7x}, \nu_{7y}$                                             | (4,4,6,6)              | 37748736                    | Fig. 5(b) and (c)  |
|                   | $\nu_{8x}, \nu_{8y}, \nu_{9x}, \nu_{9y}$<br>$\nu_{10x}, \nu_{10y}$                   | (8,8,4,4)<br>(8,8)     |                             |                    |
| $\tilde{A}^2E$    | $\nu_1, \nu_2, \nu_3$                                                                | (12,18,14)             | 967680                      | Figs. 6(c) and (d) |
|                   | $\nu_4, \nu_5,$                                                                      | (20,16)                |                             |                    |
|                   | $\nu_{6x}, \nu_{6y}, \nu_{7x}, \nu_{7y}$<br>$\nu_{8x}, \nu_{8y}, \nu_{9x}, \nu_{9y}$ | (6,6,8,8)<br>(8,8,4,4) | 2359296                     | Fig. 6(e) and (f)  |
| $\tilde{B}^2A_1$  | $\nu_1, \nu_2, \nu_3$                                                                | (14,12,16)             | 967680                      | Figs. 5(c) and (d) |
|                   | $\nu_4, \nu_5,$                                                                      | (20,18)                |                             |                    |

TABLE S4. Vibrational energy levels (in  $\text{cm}^{-1}$ ) of the  $\tilde{X}^2E$ ,  $\tilde{A}^2E$  and  $\tilde{B}^2A_1$  electronic states of  $\text{CH}_3\text{CCH}^+$  obtained from the uncoupled state calculations using the EOMIP-CCSD energy data. The assignment of the levels carried out by examining the nodal pattern of the wave functions is included in the table.

| $\tilde{X}^2E$ |           |           | $\tilde{A}^2E$            |        | $\tilde{B}^2A_1$ |                           |
|----------------|-----------|-----------|---------------------------|--------|------------------|---------------------------|
| Energy         | Ref. [43] | Ref. [52] | Assignment                | Energy | Ref. [43]        | Assignment                |
| 0              |           |           | $0_0^0$                   | 0      |                  | $0_0^0$                   |
| 876            | 940       | 930±50    | $\nu_{50}^1$              | 1024   |                  | $\nu_{50}^1$              |
| 1328           |           |           | $\nu_{40}^1$              | 1304   | 1290             | $\nu_{40}^1$              |
| 1752           |           |           | $\nu_{50}^2$              | 2048   |                  | $\nu_{50}^2$              |
| 2169           | 1940      | 2000±50   | $\nu_{30}^1$              | 2145   |                  | $\nu_{30}^1$              |
| 2204           |           |           | $\nu_{40}^1 + \nu_{50}^1$ | 2328   |                  | $\nu_{40}^1 + \nu_{50}^1$ |
| 2628           |           |           | $\nu_{50}^3$              | 2602   |                  | $\nu_{40}^2$              |
| 2655           |           |           | $\nu_{40}^2$              | 3073   |                  | $\nu_{50}^3$              |
| 3046           |           |           | $\nu_{30}^1 + \nu_{50}^1$ | 3169   |                  | $\nu_{30}^1 + \nu_{50}^1$ |
| 3067           |           |           | $\nu_{20}^1$              | 3178   |                  | $\nu_{20}^1$              |
| 3080           |           |           | $\nu_{40}^1 + \nu_{50}^2$ | 3353   |                  | $\nu_{40}^1 + \nu_{50}^2$ |
| 3497           |           |           | $\nu_{10}^1$              | 3449   |                  | $\nu_{30}^1 + \nu_{40}^1$ |
| 3498           |           |           | $\nu_{30}^1 + \nu_{40}^1$ | 3495   |                  | $\nu_{10}^1$              |
| 3504           |           |           | $\nu_{40}^5$              | 3626   |                  | $\nu_{40}^2 + \nu_{50}^1$ |
| 3531           |           |           | $\nu_{40}^2 + \nu_{50}^1$ | 3895   |                  | $\nu_{40}^3$              |
| 3922           |           |           | $\nu_{30}^1 + \nu_{50}^2$ | 4097   |                  | $\nu_{50}^4$              |
| 3943           |           |           | $\nu_{20}^1 + \nu_{50}^1$ | 4194   |                  | $\nu_{30}^1 + \nu_{50}^2$ |
| 3956           |           |           | $\nu_{40}^1 + \nu_{50}^3$ | 4202   |                  | $\nu_{20}^1 + \nu_{50}^1$ |
| 3980           |           |           | $\nu_{40}^3$              | 4377   |                  | $\nu_{40}^1 + \nu_{50}^3$ |
| 4339           |           |           | $\nu_{30}^2$              | 4482   |                  | $\nu_{20}^1 + \nu_{40}^1$ |
| 4373           |           |           | $\nu_{10}^1 + \nu_{50}^1$ | 4520   |                  | $\nu_{10}^1 + \nu_{50}^1$ |
| 4380           |           |           | $\nu_{50}^5$              | 4651   |                  | $\nu_{40}^2 + \nu_{50}^2$ |
| 4395           |           |           | $\nu_{20}^1 + \nu_{40}^1$ | 4747   |                  | $\nu_{30}^1 + \nu_{40}^2$ |
| 4407           |           |           | $\nu_{40}^2 + \nu_{50}^2$ | 5218   |                  | $\nu_{30}^1 + \nu_{50}^3$ |
|                |           |           |                           | 5227   |                  | $\nu_{20}^1 + \nu_{50}^2$ |
|                |           |           |                           | 5323   |                  | $\nu_{20}^1 + \nu_{30}^1$ |
|                |           |           |                           | 5544   |                  | $\nu_{10}^1 + \nu_{50}^2$ |

TABLE S5. Same as in Table S4 obtained with the set of parameters derived from the CASSCF-MRCI energy data.

| $\tilde{X}^2E$ |           |           | $\tilde{A}^2E$          |        | $\tilde{B}^2A_1$ |                         |        |                         |
|----------------|-----------|-----------|-------------------------|--------|------------------|-------------------------|--------|-------------------------|
| Energy         | Ref. [43] | Ref. [52] | Assignment              | Energy | Ref. [43]        | Assignment              | Energy | Assignment              |
| 0              |           |           | $0_0^0$                 | 0      |                  | $0_0^0$                 | 0      | $0_0^0$                 |
| 876            | 940       | 930±50    | $\nu_{50}^1$            | 1033   |                  | $\nu_{50}^1$            | 914    | $\nu_{50}^1$            |
| 1341           |           |           | $\nu_{40}^1$            | 1315   | 1290             | $\nu_{40}^1$            | 1495   | $\nu_{40}^1$            |
| 1753           |           |           | $\nu_{50}^2$            | 2067   |                  | $\nu_{50}^2$            | 1828   | $\nu_{50}^2$            |
| 2168           | 1940      | 2000±50   | $\nu_{30}^1$            | 2156   |                  | $\nu_{30}^1$            | 1995   | $\nu_{30}^1$            |
| 2218           |           |           | $\nu_{40}^1+\nu_{50}^1$ | 2348   |                  | $\nu_{40}^1+\nu_{50}^1$ | 2409   | $\nu_{40}^1+\nu_{50}^1$ |
| 2630           |           |           | $\nu_{50}^3$            | 2622   |                  | $\nu_{40}^2$            | 2742   | $\nu_{50}^3$            |
| 2680           |           |           | $\nu_{40}^2$            | 3100   |                  | $\nu_{50}^3$            | 2909   | $\nu_{30}^1+\nu_{50}^1$ |
| 3045           |           |           | $\nu_{30}^1+\nu_{50}^1$ | 3183   |                  | $\nu_{20}^1$            | 2988   | $\nu_{40}^2$            |
| 3067           |           |           | $\nu_{20}^1$            | 3189   |                  | $\nu_{30}^1+\nu_{50}^1$ | 3016   | $\nu_{20}^1$            |
| 3095           |           |           | $\nu_{40}^1+\nu_{50}^2$ | 3382   |                  | $\nu_{40}^1+\nu_{50}^2$ | 3279   | $\nu_{10}^1$            |
| 3504           |           |           | $\nu_{10}^1$            | 3471   |                  | $\nu_{30}^1+\nu_{40}^1$ | 3323   | $\nu_{40}^1+\nu_{50}^2$ |
| 3509           |           |           | $\nu_{30}^1+\nu_{40}^1$ | 3499   |                  | $\nu_{10}^1$            | 3491   | $\nu_{30}^1+\nu_{40}^1$ |
| 3557           |           |           | $\nu_{40}^2+\nu_{50}^1$ | 3656   |                  | $\nu_{40}^2+\nu_{50}^1$ | 3656   | $\nu_{50}^4$            |
| 3922           |           |           | $\nu_{30}^1+\nu_{50}^2$ | 3922   |                  | $\nu_{40}^3$            | 3823   | $\nu_{30}^1+\nu_{50}^2$ |
| 3944           |           |           | $\nu_{20}^1+\nu_{50}^1$ | 4133   |                  | $\nu_{50}^4$            | 3902   | $\nu_{40}^2+\nu_{50}^1$ |
| 3972           |           |           | $\nu_{40}^1+\nu_{50}^3$ | 4216   |                  | $\nu_{20}^1+\nu_{50}^1$ | 3930   | $\nu_{20}^1+\nu_{50}^1$ |
| 4017           |           |           | $\nu_{40}^3$            | 4223   |                  | $\nu_{30}^1+\nu_{50}^2$ | 3991   | $\nu_{30}^2$            |
| 4337           |           |           | $\nu_{30}^2$            | 4312   |                  | $\nu_{30}^2$            | 4193   | $\nu_{10}^1+\nu_{50}^1$ |
| 4381           |           |           | $\nu_{10}^2+\nu_{50}^1$ | 4415   |                  | $\nu_{40}^1+\nu_{50}^3$ |        |                         |
| 4386           |           |           | $\nu_{50}^5$            | 4498   |                  | $\nu_{20}^1+\nu_{40}^1$ |        |                         |
| 4408           |           |           | $\nu_{20}^1+\nu_{40}^1$ | 4532   |                  | $\nu_{10}^1+\nu_{50}^1$ |        |                         |
|                |           |           |                         | 4689   |                  | $\nu_{40}^2+\nu_{50}^2$ |        |                         |
|                |           |           |                         | 4779   |                  | $\nu_{30}^1+\nu_{40}^2$ |        |                         |
|                |           |           |                         | 5256   |                  | $\nu_{30}^1+\nu_{50}^3$ |        |                         |
|                |           |           |                         | 5339   |                  | $\nu_{20}^1+\nu_{30}^1$ |        |                         |
|                |           |           |                         | 5346   |                  | $\nu_{30}^2+\nu_{50}^1$ |        |                         |

TABLE S6. Normal mode combinations, sizes of the primitive and single particle bases used in the MCTDH calculations. <sup>a</sup> The primitive basis consists of harmonic oscillator DVR functions, in the dimensionless normal coordinate required to represent the system dynamics along the relevant mode. The primitive basis for each particle is the product of the one-dimensional bases; <sup>b</sup> The SPF basis is the number of the single particle functions used.

| Electronic state                  | Normal modes                               | Primitive basis <sup>a</sup> | SPF basis <sup>b</sup> |                   |
|-----------------------------------|--------------------------------------------|------------------------------|------------------------|-------------------|
| $\tilde{X}^2E$                    | $\nu_1, \nu_{6x}, \nu_{6y}, \nu_2$         | (6,10,10,8)                  | [8,8]                  | Fig. 7(b) and (c) |
|                                   | $\nu_4, \nu_{7x}, \nu_{7y}, \nu_3$         | (16,14,14,14)                | [8,8]                  |                   |
|                                   | $\nu_{8x}, \nu_{8y}, \nu_5$                | (16,16,10)                   | [8,8]                  |                   |
|                                   | $\nu_{9x}, \nu_{9y}, \nu_{10x}, \nu_{10y}$ | (12,12,16,16)                | [10,10]                |                   |
| $\tilde{A}^2E$ & $\tilde{B}^2A_1$ | $\nu_1, \nu_{6x}, \nu_{6y}, \nu_2$         | (10,12,12,14)                | [22,22,12]             | Fig. 7(b) and (c) |
|                                   | $\nu_4, \nu_{7x}, \nu_{7y}, \nu_3$         | (12,18,18,18)                | [24,24,12]             |                   |
|                                   | $\nu_{8x}, \nu_{8y}, \nu_5$                | (16,16,14)                   | [22,22,12]             |                   |
|                                   | $\nu_{9x}, \nu_{9y}$                       | (12,12)                      | [20,20,10]             |                   |



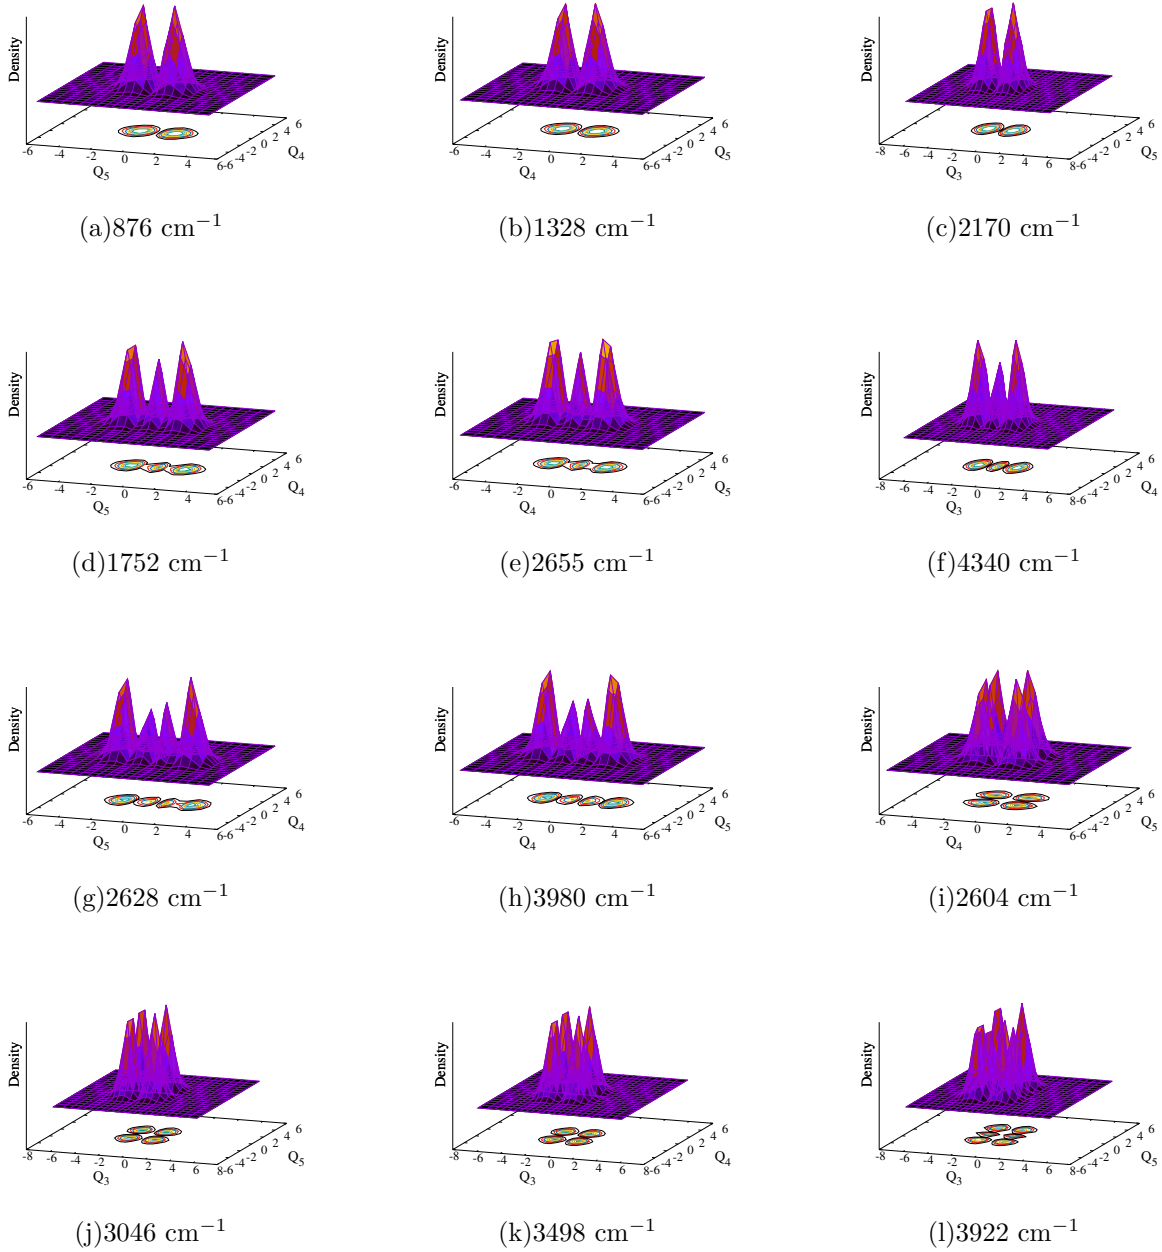

FIG. S1. Probability density of vibronic wave functions of the  $\tilde{X}^2E$  electronic state of  $\text{CH}_3\text{CCH}^+$  as a function of nuclear coordinate. The EOMIP-CCSD Hamiltonian parameters are used in the calculations. Panels a-c and d-f represent the fundamentals and first overtone of  $\nu_5$ ,  $\nu_4$  and  $\nu_3$  vibrational modes, respectively. Panels g and h represent the second overtone of  $\nu_5$  and  $\nu_4$  modes. The wave functions in panels i-l represent the combination peaks of  $\nu_5$ ,  $\nu_4$  and  $\nu_3$  modes.

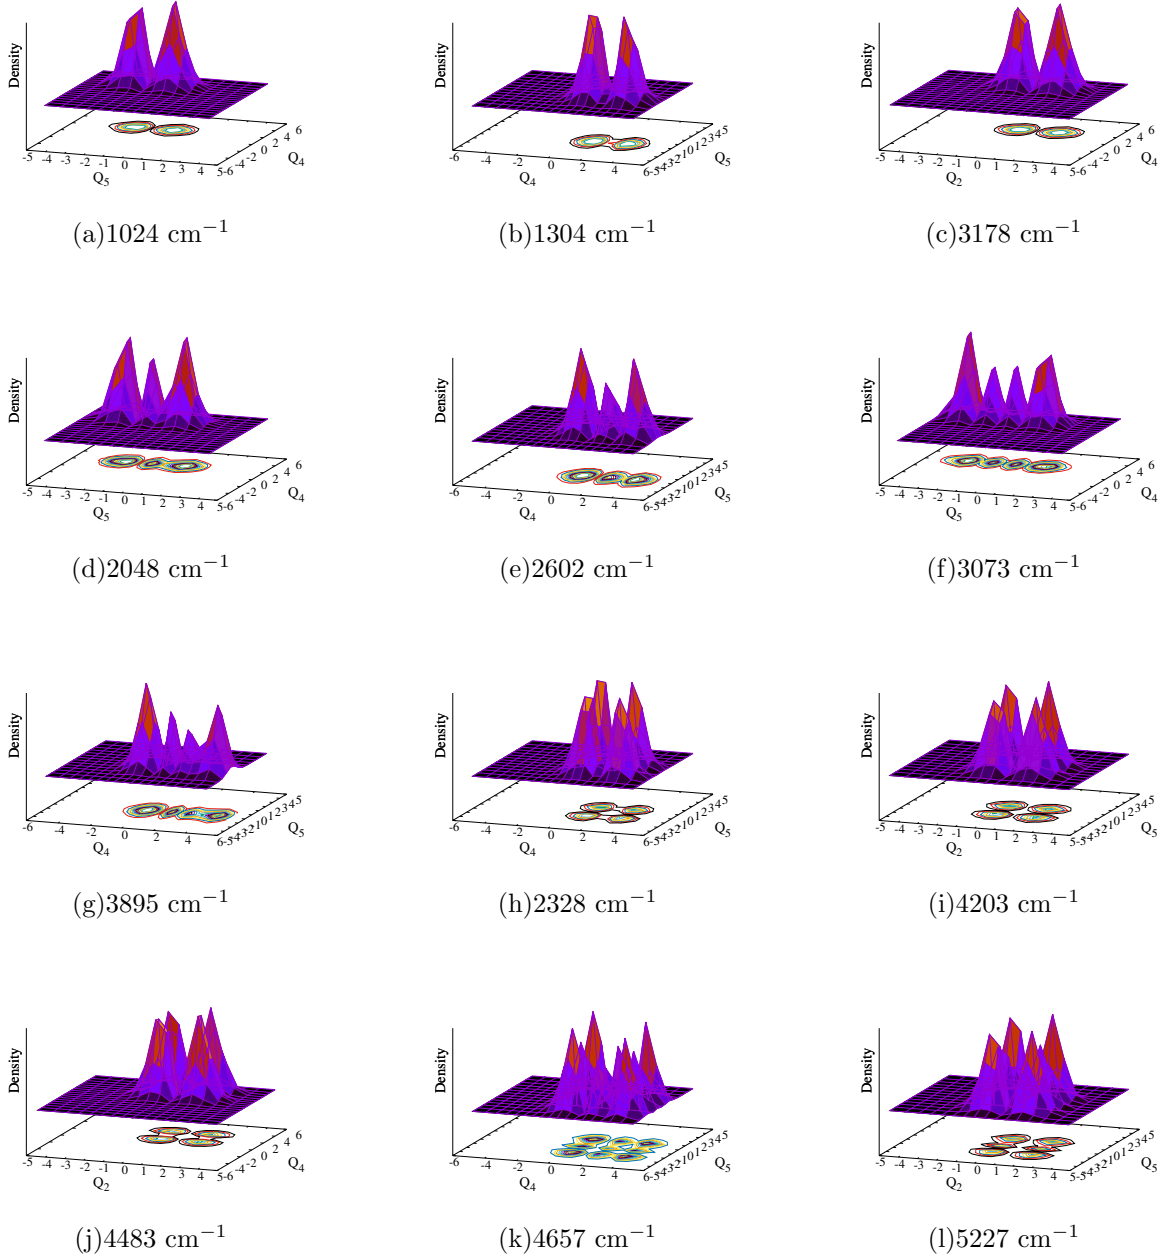

FIG. S2. Probability density of vibronic wave functions of the  $\tilde{A}^2E$  electronic state of  $\text{CH}_3\text{CCH}^+$  as a function of nuclear coordinate. The EOMIP-CCSD Hamiltonian parameters are used in the calculations. Panels a-c and d-e represent the fundamentals and first overtone of  $\nu_5$ ,  $\nu_4$  and  $\nu_2$  vibrational modes, respectively. Panels f and g represent the second overtone of  $\nu_5$  and  $\nu_4$  modes. The wave functions in panels h-l represent the combination peaks of  $\nu_5$ ,  $\nu_4$  and  $\nu_2$  modes.

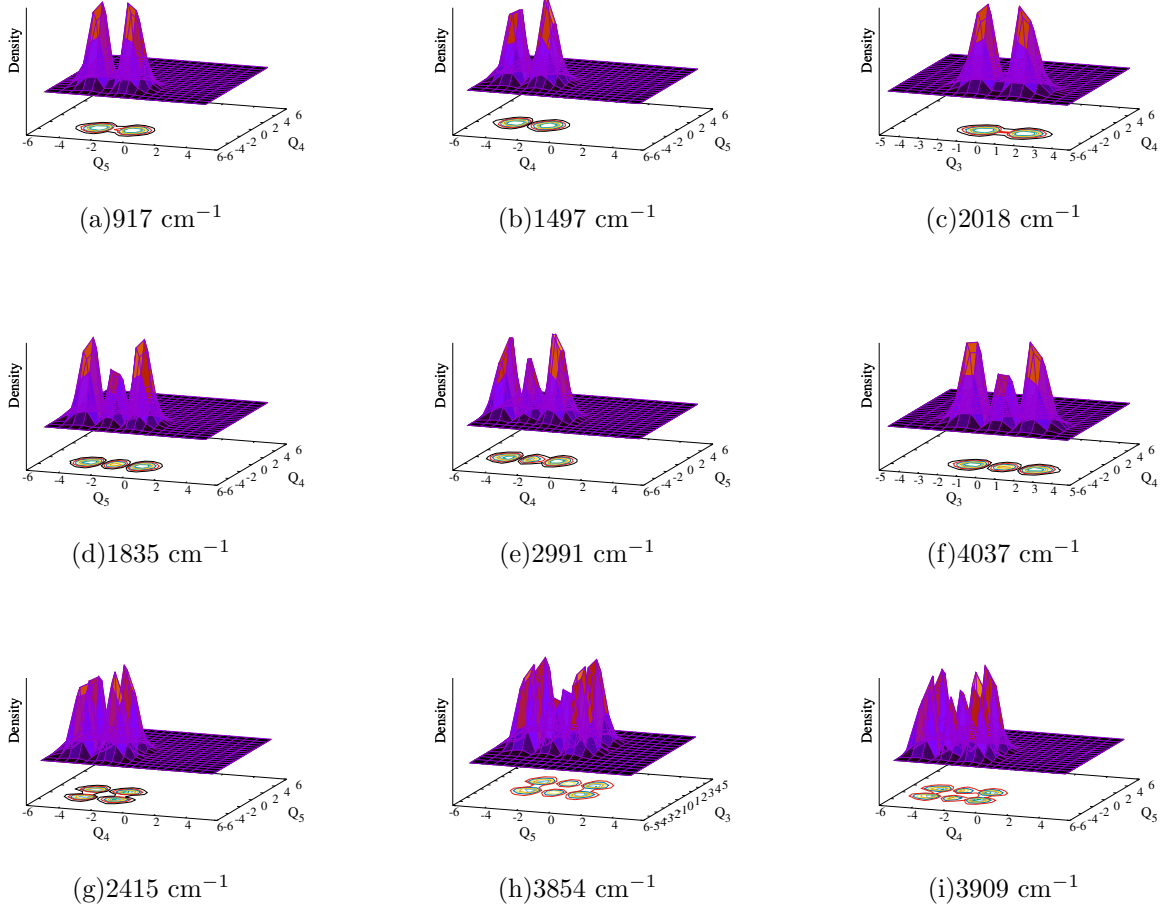

FIG. S3. Probability density of vibronic wave functions of the  $\tilde{B}^2A_1$  electronic state of  $\text{CH}_3\text{CCH}^+$  as a function of nuclear coordinate. The EOMIP-CCSD Hamiltonian parameters are used in the calculations. Panels a-c and d-f represent the fundamentals and first overtone of  $\nu_5$ ,  $\nu_4$  and  $\nu_3$  vibrational modes, respectively. The wave functions in panels g-i represent the combination peaks of  $\nu_5$ ,  $\nu_4$  and  $\nu_3$  modes.
